# Supplementary material for: Predictors of survival for pediatric extracorporeal cardiopulmonary resuscitation: A systematic review and meta-analysis
Source: PubMed Central journal article supplement — Medicine (Baltimore). 2022 Sep 30;101(39):e30860. doi: 10.1097/MD.0000000000030860 (PMC9524896; doi:10.1097/md.0000000000030860), 2022-09-30
Supplement: medi-101-e30860-s001.pdf [file medi-101-e30860-s001.pdf]

### Supplemental Table 1: Search Strategy per Database

Pubmed (n = 1187)

|   | Searches                                                                                                                                                                                                                                                                                                                        | Results |
|---|---------------------------------------------------------------------------------------------------------------------------------------------------------------------------------------------------------------------------------------------------------------------------------------------------------------------------------|---------|
| 1 | ("child"[MeSH Terms] OR "infant, newborn"[MeSH Terms] OR "pediatrics"[MeSH Terms] OR p?ediatr* OR child* OR infant* OR neonat* OR "neo-nat*")                                                                                                                                                                                   | 3462515 |
| 2 | ("Extracorporeal membrane oxygenation" [MeSH Terms] OR ecmo OR ecpr OR eclc OR "e-cmo" OR "e-cpr" OR "e-clc" OR (extracorp* OR "extra corp*" OR "extra-corp*") AND (oxygenat* OR "membran* oxygenat*" OR "life support" OR resuscitation OR cpr OR "cardiopulmonary resuscitation" OR membran* OR "Life-support" OR circulat*)) | 37936   |
| 3 | ("heart arrest"[MeSH Terms] OR "resuscitation"[MeSH Terms] OR "cardiopulmonary resuscitation"[MeSH Terms] OR "death, sudden, cardiac"[MeSH Terms]) OR (cardia* OR heart OR circulat* OR cardiopulmonary* OR "cardio-pulm*") AND (arrest* OR death* OR standstill* OR attack* OR resuscit*) OR CPR OR Resuscitation)             | 376587  |
| 4 | "Animals"[Mesh] NOT ("Animals"[Mesh] AND "Humans"[Mesh])                                                                                                                                                                                                                                                                        | 4873253 |
| 5 | #1 AND #2 AND #3                                                                                                                                                                                                                                                                                                                | 2295    |
| 6 | #5 NOT #4                                                                                                                                                                                                                                                                                                                       | 2259    |
| 7 | #6 Filters: from 2010 - 2021                                                                                                                                                                                                                                                                                                    | 1187    |

Scopus (n = 6711)

| # | Searches                                                                                                                                                                                                                                                                              | Results |
|---|---------------------------------------------------------------------------------------------------------------------------------------------------------------------------------------------------------------------------------------------------------------------------------------|---------|
| 1 | (p?ediatr* OR child* OR infant* OR neonat* OR "neo-nat*")                                                                                                                                                                                                                             | 8649913 |
| 2 | (( ecmo OR ecpr OR eclc OR "e-cmo" OR "e-cpr" OR "e-clc" ) OR ( ( extracorp* OR "extra corp*" OR "extra-corp*" ) PRE/3 ( oxygenat* OR "membran* oxygenat*" OR "life support" OR resuscitation OR cpr OR "cardiopulmonary resuscitation" OR membran* OR "life-Support" OR circulat*))) | 93086   |
| 3 | ( "sudden cardiac arrest" OR "cardiopulmonary arrest" OR "cardiopulmonary resuscitation" OR cpr OR resuscitation OR ( ( heart OR cardiopulmonary* OR cardiac OR circulat* ) PRE/3 ( arrest* OR death* OR standstill* OR attack* ) ) )                                                 | 574060  |
| 4 | #1 AND #2 AND #3                                                                                                                                                                                                                                                                      | 9628    |
| 5 | #4 AND PUBYEAR > 2009                                                                                                                                                                                                                                                                 | 6711    |

Embase (n =4,123)

| # | Searches | Results |
|---|----------|---------|
|---|----------|---------|

|   |                                                                                                                                                                                                                                                                                                                                                                                                                           |         |
|---|---------------------------------------------------------------------------------------------------------------------------------------------------------------------------------------------------------------------------------------------------------------------------------------------------------------------------------------------------------------------------------------------------------------------------|---------|
| 1 | ('child'/exp OR 'pediatric'/exp OR 'newborn'/exp OR 'infant'/exp OR p?ediatr* OR child* OR infant* OR neonat* OR 'neo nat*')                                                                                                                                                                                                                                                                                              | 4443412 |
| 2 | ('extracorporeal therapy'/exp OR 'extracorporeal oxygenation'/exp OR 'extracorporeal membrane oxygenation device'/exp OR 'extracorporeal cardiopulmonary resuscitation'/exp OR ecmo OR ecpr OR ecls OR 'e cmo' OR 'e cpr' OR 'e cls' OR ((extracorp* OR 'extra corp*' OR 'extra corp*') NEAR/3 (oxygenat* OR 'membran* oxygenat*' OR 'life support' OR resuscitation OR cpr OR membran* OR 'life support' OR circulat*))) | 382402  |
| 3 | ('sudden cardiac death'/exp OR 'cardiopulmonary arrest'/exp OR 'resuscitation'/exp OR 'heart arrest'/exp OR 'cardiogenic shock'/exp OR 'sudden cardiac arrest' OR 'cardiopulmonary arrest' OR 'cardiopulmonary resuscitation' OR cpr OR resuscitation OR ((heart OR cardiopulmonary* OR cardiac OR circulat* OR 'cardio pulm*') NEAR/3 (arrest* OR death* OR standstill* OR attack* OR resuscit*)))                       | 356632  |
| 4 | ('animal'/exp NOT 'human'/exp)                                                                                                                                                                                                                                                                                                                                                                                            | 5582792 |
| 5 | # 1 AND #2 AND #3 NOT #4                                                                                                                                                                                                                                                                                                                                                                                                  | 5551    |
| 6 | #5 AND (2010:py OR 2011:py OR 2012:py OR 2013:py OR 2014:py OR 2015:py OR 2016:py OR 2017:py OR 2018:py OR 2019:py OR 2020:py OR 2021:py)                                                                                                                                                                                                                                                                                 | 4123    |

Cochrane (n=51)

| #  | Searches                                                                                     | Results |
|----|----------------------------------------------------------------------------------------------|---------|
| 1  | MeSH descriptor: [Infant] explode all trees                                                  | 32413   |
| 2  | MeSH descriptor: [Child] explode all trees                                                   | 56688   |
| 3  | MeSH descriptor: [Infant, Newborn] explode all trees                                         | 16143   |
| 4  | (child):ti,ab,kw (Word variations have been searched)                                        | 149608  |
| 5  | (pediatric):ti,ab,kw (Word variations have been searched)                                    | 34514   |
| 6  | (neonate):ti,ab,kw (Word variations have been searched)                                      | 22356   |
| 7  | (infant):ti,ab,kw (Word variations have been searched)                                       | 61102   |
| 8  | #1 or #2 or #3 or #4 or #5 or #6 or #7                                                       | 194770  |
| 9  | MeSH descriptor: [Extracorporeal Membrane Oxygenation] explode all trees                     | 179     |
| 10 | (extracorporeal cardiopulmonary resuscitation):ti,ab,kw (Word variations have been searched) | 48      |
| 11 | (extracorporeal membrane oxygenation) :ti,ab,kw (Word variations have been searched)         | 710     |
| 12 | (extracorporeal life support) :ti,ab,kw (Word variations have been searched)                 | 132     |
| 13 | (ecpr) :ti,ab,kw (Word variations have been searched)                                        | 21      |
| 14 | (ecmo) :ti,ab,kw (Word variations have been searched)                                        | 621     |
| 15 | (ecls) :ti,ab,kw (Word variations have been searched)                                        | 172     |
| 16 | #9 or #10 or #11 or #12 or #13 or #14 or #15                                                 | 1196    |

|    |                                                                                       |       |
|----|---------------------------------------------------------------------------------------|-------|
| 17 | MeSH descriptor: [Cardiopulmonary Resuscitation] explode all trees                    | 1095  |
| 18 | MeSH descriptor: [Resuscitation] explode all trees                                    | 5073  |
| 19 | MeSH descriptor: [Heart Arrest] explode all trees                                     | 1964  |
| 20 | MeSH descriptor: [Death, Sudden, Cardiac] explode all trees                           | 631   |
| 21 | (heart arrest) :ti,ab,kw (Word variations have been searched)                         | 4292  |
| 22 | (cardiac arrest) :ti,ab,kw (Word variations have been searched)                       | 4456  |
| 23 | (cardiopulmonary resuscitation) :ti,ab,kw (Word variations have been searched)        | 2376  |
| 24 | (sudden cardiac death) :ti,ab,kw (Word variations have been searched)                 | 2138  |
| 25 | (resuscitation) :ti,ab,kw (Word variations have been searched)                        | 8115  |
| 26 | (cardiopulmonary arrest) :ti,ab,kw (Word variations have been searched)               | 2034  |
| 27 | #17 or #18 or #19 or #20 or #21 or #22 or #23 or #24 or #25                           | 16406 |
| 28 | #8 and #16 and #27 (with Cochrane Library publication date from Jan 2010 to Jan 2021) | 51    |
