# Supplementary material for: Predictors of survival for pediatric extracorporeal cardiopulmonary resuscitation: A systematic review and meta-analysis
Source: PubMed Central journal article supplement — Medicine (Baltimore). 2022 Sep 30;101(39):e30860. doi: 10.1097/MD.0000000000030860 (PMC9524896; doi:10.1097/md.0000000000030860), 2022-09-30
Supplement: medi-101-e30860-s002.pdf [file medi-101-e30860-s002.pdf]

**Supplemental Table 2: Grading of Recommendations, Assessment, Development, and Evaluation (GRADE) assessment of Predictors of Survival.**

| GRADE Score for Predictors of Mortality |         |              |               |              |             |                  |               |
|-----------------------------------------|---------|--------------|---------------|--------------|-------------|------------------|---------------|
| Outcomes                                | Studies | Risk of Bias | Inconsistency | Indirectness | Imprecision | Publication Bias | Overall GRADE |
| Age                                     | 23      | Very serious | Serious       | Not serious  | Serious     | Not serious      | Very low      |
| Gender-Male                             | 18      | Very serious | Not serious   | Not serious  | Not serious | Not serious      | Very low      |
| Race-Asian                              | 5       | Very serious | Not serious   | Not serious  | Serious     | Not serious      | Very low      |
| Race-Black                              | 5       | Very serious | Not serious   | Not serious  | Serious     | Not serious      | Very low      |
| Race-Hispanic                           | 4       | Very serious | Not serious   | Not serious  | Serious     | Not serious      | Very low      |
| Race-White                              | 5       | Very serious | Not serious   | Not serious  | Not serious | Not serious      | Very low      |
| Weight                                  | 18      | Very serious | Serious       | Not serious  | Serious     | Not serious      | Very low      |
| CPR Duration                            | 16      | Very serious | Not serious   | Not serious  | Serious     | Not serious      | Very low      |
| ECMO Duration                           | 20      | Very serious | Not serious   | Not serious  | Serious     | Not serious      | Very low      |
| ECMO flow at 24h                        | 3       | Very serious | Not serious   | Not serious  | Serious     | Not serious      | Very low      |
| ECMO flow at 4h                         | 4       | Very serious | Not serious   | Not serious  | Serious     | Not serious      | Very low      |
| Site-Femoral                            | 2       | Very serious | Not serious   | Not serious  | Serious     | Not serious      | Very low      |
| Site-Neck                               | 6       | Very serious | Not serious   | Not serious  | Serious     | Not serious      | Very low      |
| Site-Thorax                             | 6       | Very serious | Not serious   | Not serious  | Serious     | Not serious      | Very low      |
| Creatinine                              | 4       | Very serious | Not serious   | Not serious  | Serious     | Not serious      | Very low      |
| HCO <sub>3</sub>                        | 4       | Very serious | Not serious   | Not serious  | Serious     | Not serious      | Very low      |

|                                                                                                                                                                                                                                                                                                               |    |              |             |             |             |             |          |
|---------------------------------------------------------------------------------------------------------------------------------------------------------------------------------------------------------------------------------------------------------------------------------------------------------------|----|--------------|-------------|-------------|-------------|-------------|----------|
| Lactate                                                                                                                                                                                                                                                                                                       | 10 | Very serious | Not serious | Not serious | Serious     | Not serious | Very low |
| PaCO2                                                                                                                                                                                                                                                                                                         | 4  | Very serious | Not serious | Not serious | Serious     | Not serious | Very low |
| PaO2                                                                                                                                                                                                                                                                                                          | 4  | Very serious | Not serious | Not serious | Serious     | Not serious | Very low |
| pH                                                                                                                                                                                                                                                                                                            | 14 | Very serious | Not serious | Not serious | Serious     | Not serious | Very low |
| Single Ventricle Physiology                                                                                                                                                                                                                                                                                   | 12 | Very serious | Serious     | Not serious | Serious     | Not serious | Very low |
| Primary Myocardial Disease                                                                                                                                                                                                                                                                                    | 4  | Very serious | Not serious | Not serious | Serious     | Not serious | Very low |
| Pulmonary Hypertension                                                                                                                                                                                                                                                                                        | 3  | Very serious | Not serious | Not serious | Serious     | Not serious | Very low |
| Renal Failure                                                                                                                                                                                                                                                                                                 | 3  | Very serious | Not serious | Not serious | Serious     | Not serious | Very low |
| Sepsis                                                                                                                                                                                                                                                                                                        | 3  | Very serious | Not serious | Not serious | Serious     | Not serious | Very low |
| Neurological Complications                                                                                                                                                                                                                                                                                    | 2  | Very serious | Not serious | Not serious | Serious     | Not serious | Very low |
| Pulmonary hemorrhage                                                                                                                                                                                                                                                                                          | 4  | Very serious | Not serious | Not serious | Serious     | Not serious | Very low |
| Renal Failure                                                                                                                                                                                                                                                                                                 | 4  | Very serious | Not serious | Not serious | Serious     | Not serious | Very low |
| Sepsis                                                                                                                                                                                                                                                                                                        | 4  | Very serious | Not serious | Not serious | Serious     | Not serious | Very low |
| Survival to Hospital Discharge                                                                                                                                                                                                                                                                                | 30 | Very Serious | Serious     | Not serious | Not Serious | Not Serious | Very low |
| <p>Inconsistency across studies was graded as serious when heterogeneity was significant (<math>p &lt; 0.05</math> or <math>I^2 &gt; 50\%</math>). Imprecision was graded as serious when either the lower or the upper bound of the CIs was less or more – respectively – than 20% of the point estimate</p> |    |              |             |             |             |             |          |
