# Supplementary material for: Predictors of survival for pediatric extracorporeal cardiopulmonary resuscitation: A systematic review and meta-analysis
Source: PubMed Central journal article supplement — Medicine (Baltimore). 2022 Sep 30;101(39):e30860. doi: 10.1097/MD.0000000000030860 (PMC9524896; doi:10.1097/md.0000000000030860), 2022-09-30
Supplement: medi-101-e30860-s003.pdf [file medi-101-e30860-s003.pdf]

**Supplemental Table 3. Quality assessment of included non-randomized trials using Newcastle Ottawa Scale**

| Study                  | Selection                |                                 |                       | Comparability          | Exposure                            |                           |                                                     | Total |                   |
|------------------------|--------------------------|---------------------------------|-----------------------|------------------------|-------------------------------------|---------------------------|-----------------------------------------------------|-------|-------------------|
|                        | Case definition adequacy | Representativeness of the cases | Selection of controls | Definition of controls | Comparability of cases and controls | Ascertainment of exposure | Same method of ascertainment for cases and controls |       | Non-response rate |
| Alsoufi, B., 2014      | 1                        | 1                               | 0                     | 1                      | 2                                   | 1                         | 1                                                   | 1     | 8                 |
| Anton-Martin, P., 2020 | 1                        | 1                               | 0                     | 1                      | 2                                   | 1                         | 1                                                   | 1     | 8                 |
| Bembea, M., 2019       | 1                        | 1                               | 0                     | 1                      | 1                                   | 1                         | 1                                                   | 1     | 7                 |
| Beshish, A., 2018      | 1                        | 1                               | 0                     | 1                      | 0                                   | 1                         | 1                                                   | 1     | 6                 |
| Brunner, A., 2016      | 1                        | 1                               | 0                     | 1                      | 2                                   | 1                         | 1                                                   | 1     | 8                 |
| Chen, G., 2018         | 1                        | 1                               | 0                     | 1                      | 1                                   | 1                         | 1                                                   | 1     | 7                 |
| Chrysostomou, C., 2013 | 1                        | 1                               | 0                     | 1                      | 1                                   | 1                         | 1                                                   | 1     | 7                 |
| De Mul, A., 2019       | 1                        | 1                               | 0                     | 1                      | 2                                   | 1                         | 1                                                   | 1     | 8                 |

|                               |   |   |   |   |   |   |   |   |   |
|-------------------------------|---|---|---|---|---|---|---|---|---|
| Erek, E., 2017                | 1 | 1 | 0 | 1 | 1 | 1 | 1 | 1 | 7 |
| Guo, Z., 2019                 | 1 | 1 | 0 | 1 | 1 | 1 | 1 | 1 | 7 |
| Huang, S.,<br>2012            | 1 | 1 | 0 | 1 | 1 | 1 | 1 | 1 | 7 |
| Jolley, M.,<br>2014           | 1 | 1 | 0 | 1 | 1 | 1 | 1 | 1 | 7 |
| Kane, D., 2010                | 1 | 1 | 0 | 1 | 2 | 1 | 1 | 1 | 8 |
| <u>Kendırlı, T.,<br/>2020</u> | 1 | 1 | 0 | 1 | 0 | 1 | 1 | 1 | 6 |
| Kramer, P.,<br>2020           | 1 | 1 | 0 | 1 | 1 | 1 | 1 | 1 | 7 |
| McMullan, D.,<br>2014         | 1 | 1 | 0 | 1 | 2 | 1 | 1 | 1 | 8 |
| Melvan, J.,<br>2020           | 1 | 1 | 0 | 1 | 2 | 1 | 1 | 1 | 8 |
| Philip, J., 2014              | 1 | 1 | 0 | 1 | 2 | 1 | 1 | 1 | 8 |
| Polimenakos,<br>A., 2017      | 1 | 1 | 0 | 1 | 1 | 1 | 1 | 1 | 7 |
| Raymond, T.,<br>2010          | 1 | 1 | 0 | 1 | 2 | 1 | 1 | 1 | 8 |
| Shakoor, A.,<br>2019          | 1 | 1 | 0 | 1 | 2 | 1 | 1 | 1 | 8 |
| Shin, H., 2016                | 1 | 1 | 0 | 1 | 1 | 1 | 1 | 1 | 7 |

|                            |   |   |   |   |   |   |   |   |   |
|----------------------------|---|---|---|---|---|---|---|---|---|
| Sivarajan, V.,<br>2011     | 1 | 1 | 0 | 1 | 1 | 1 | 1 | 1 | 7 |
| Topjian, A.,<br>2019       | 1 | 1 | 0 | 1 | 2 | 1 | 1 | 1 | 8 |
| Torres-Andres,<br>F., 2018 | 1 | 1 | 0 | 1 | 2 | 1 | 1 | 1 | 8 |
| Tsukahara, K.,<br>2014     | 1 | 1 | 0 | 1 | 0 | 1 | 1 | 1 | 6 |
| Walter, E.,<br>2011        | 1 | 1 | 0 | 1 | 2 | 1 | 1 | 1 | 8 |
| Wolf, M., 2012             | 1 | 1 | 0 | 1 | 1 | 1 | 1 | 1 | 7 |
| Yates, A.,<br>2019         | 1 | 1 | 0 | 1 | 1 | 1 | 1 | 1 | 7 |
| Zeybek, C.,<br>2017        | 1 | 1 | 0 | 1 | 0 | 1 | 1 | 1 | 6 |
