# Supplementary material for: Predictors of survival for pediatric extracorporeal cardiopulmonary resuscitation: A systematic review and meta-analysis
Source: PubMed Central journal article supplement — Medicine (Baltimore). 2022 Sep 30;101(39):e30860. doi: 10.1097/MD.0000000000030860 (PMC9524896; doi:10.1097/md.0000000000030860), 2022-09-30
Supplement: medi-101-e30860-s004.pdf [file medi-101-e30860-s004.pdf]

**Supplemental Table 4. Meta-regression models for the associations between potential covariates and survival outcome**

| <b>Covariate</b>          | <b>Number of studies</b> | <b>Estimate (95% CI)</b>   | <b>P value</b> |
|---------------------------|--------------------------|----------------------------|----------------|
| Year                      | 30                       | -0.0043 (-0.0176, 0.0091)  | 0.533          |
| Number of patients (n)    | 30                       | 0.0000 ( -0.0002, 0.0003)  | 0.810          |
| Age (mean days)           | 24                       | -0.0000 (-0.0001, 0.0000)  | 0.284          |
| Duration of CPR (minutes) | 17                       | -0.0055 (-0.0084, -0.0025) | 0.0003         |
| Shockable Rhythm          | 6                        | -0.0013 (-0.0026, 0.0000)  | 0.0575         |
