# Supplementary material for: Predictors of survival for pediatric extracorporeal cardiopulmonary resuscitation: A systematic review and meta-analysis
Source: PubMed Central journal article supplement — Medicine (Baltimore). 2022 Sep 30;101(39):e30860. doi: 10.1097/MD.0000000000030860 (PMC9524896; doi:10.1097/md.0000000000030860), 2022-09-30
Supplement: medi-101-e30860-s005.pdf [file medi-101-e30860-s005.pdf]

**Supplemental Table 5. Sensitivity Analysis of PaCO<sub>2</sub> as a Predictor of Survival**

| <b>Study</b>                                                                                                                                                                         | <b>I<sup>2</sup></b> | <b>SMD</b>            | <b>P</b> |
|--------------------------------------------------------------------------------------------------------------------------------------------------------------------------------------|----------------------|-----------------------|----------|
| Omitting Anton-Martin 2020                                                                                                                                                           | 0%                   | -0.13 [-0.32 - 0.06]  |          |
| Omitting Brunner                                                                                                                                                                     | 0%                   | -0.13 [-0.31 - 0.05]  |          |
| Omitting De Mul 2018                                                                                                                                                                 | 0%                   | -0.12 [-0.25 - 0.01]  |          |
| Omitting Huang 2012                                                                                                                                                                  | 0%                   | -0.15 [-0.24 - -0.07] | *        |
| Omitting McMullan 2014                                                                                                                                                               | 0%                   | -0.12 [-0.42 - 0.18]  |          |
| *P values are coded as * if less than 0.05.<br>This leave-one-out sensitivity analysis found that PaCO <sub>2</sub> was not a significant predictor of mortality in 4 of 5 analyses. |                      |                       |          |
