# Supplementary material for: Predictors of survival for pediatric extracorporeal cardiopulmonary resuscitation: A systematic review and meta-analysis
Source: PubMed Central journal article supplement — Medicine (Baltimore). 2022 Sep 30;101(39):e30860. doi: 10.1097/MD.0000000000030860 (PMC9524896; doi:10.1097/md.0000000000030860), 2022-09-30
Supplement: medi-101-e30860-s006.pdf [file medi-101-e30860-s006.pdf]

**Supplemental Table 6. Sensitivity Analysis Demonstrating Robustness of CPR Duration.**

| <b>Study</b>                                                                                                                                                                                                                      | <b>I2</b> | <b>SMD</b>            | <b>P</b> |
|-----------------------------------------------------------------------------------------------------------------------------------------------------------------------------------------------------------------------------------|-----------|-----------------------|----------|
| Omitting Alsoufi 2014                                                                                                                                                                                                             | 38%       | -0.35 [-0.54 - -0.16] | *        |
| Omitting Anton-Martin 2020                                                                                                                                                                                                        | 38%       | -0.35 [-0.55 - -0.16] | *        |
| Omitting Brunner                                                                                                                                                                                                                  | 40%       | -0.36 [-0.55 - -0.17] | *        |
| Omitting Chrysostomou 2013                                                                                                                                                                                                        | 40%       | -0.37 [-0.57 - -0.18] | *        |
| Omitting De Mul 2018                                                                                                                                                                                                              | 36%       | -0.34 [-0.53 - -0.15] | *        |
| Omitting Delmo-Walter 2011                                                                                                                                                                                                        | 29%       | -0.32 [-0.5 - -0.15]  | *        |
| Omitting Huang 2012                                                                                                                                                                                                               | 40%       | -0.36 [-0.56 - -0.17] | *        |
| Omitting Kane 2010                                                                                                                                                                                                                | 36%       | -0.39 [-0.58 - -0.2]  | *        |
| Omitting Kramer 2010                                                                                                                                                                                                              | 31%       | -0.39 [-0.57 - -0.22] | *        |
| Omitting Melvan 2020                                                                                                                                                                                                              | 27%       | -0.4 [-0.58 - -0.22]  | *        |
| Omitting Polimenakos 2017                                                                                                                                                                                                         | 40%       | -0.36 [-0.55 - -0.17] | *        |
| Omitting Raymond 2010                                                                                                                                                                                                             | 40%       | -0.37 [-0.57 - -0.17] | *        |
| Omitting Shin 2016                                                                                                                                                                                                                | 38%       | -0.35 [-0.54 - -0.16] | *        |
| Omitting Sivarajan 2011                                                                                                                                                                                                           | 22%       | -0.31 [-0.48 - -0.15] | *        |
| Omitting Topjian 2019                                                                                                                                                                                                             | 40%       | -0.38 [-0.58 - -0.19] | *        |
| Omitting Tsukahara 2014                                                                                                                                                                                                           | 41%       | -0.37 [-0.56 - -0.18] | *        |
| Omitting Yates 2019                                                                                                                                                                                                               | 37%       | -0.35 [-0.53 - -0.16] | *        |
| <p>*P values are coded as * if less than 0.05.<br/>           This leave-one-out sensitivity analysis found that despite the detection of publication bias, the effect of CPR duration as a predictor of survival was robust.</p> |           |                       |          |
