# Supplementary material for: Predictors of survival for pediatric extracorporeal cardiopulmonary resuscitation: A systematic review and meta-analysis
Source: PubMed Central journal article supplement — Medicine (Baltimore). 2022 Sep 30;101(39):e30860. doi: 10.1097/MD.0000000000030860 (PMC9524896; doi:10.1097/md.0000000000030860), 2022-09-30
Supplement: medi-101-e30860-s008.pdf [file medi-101-e30860-s008.pdf]

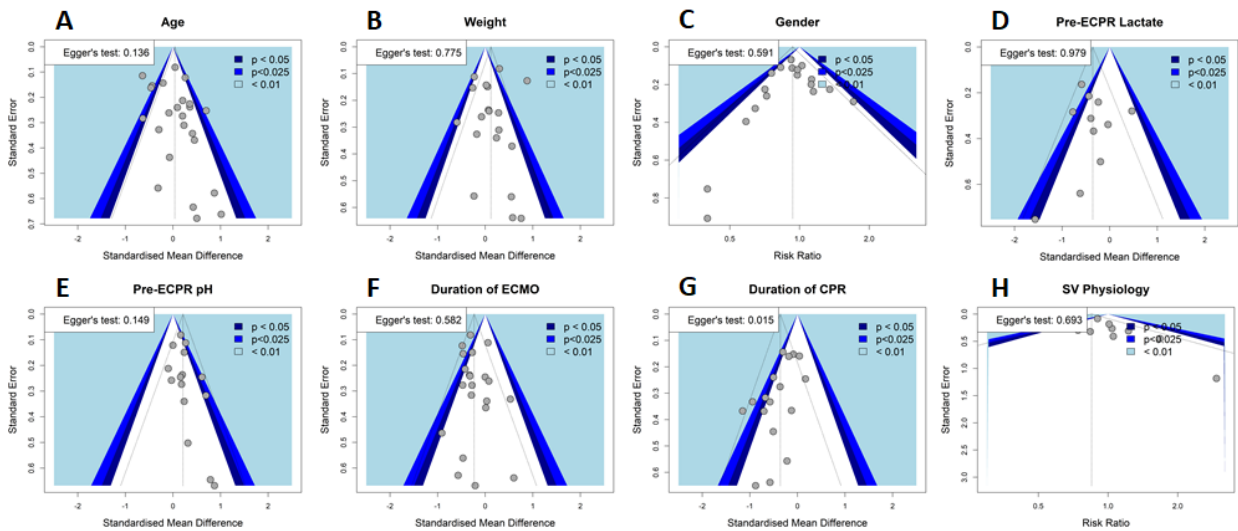

**Supplemental Figure 2. Funnel plots examining publication bias in Patient Demographics Metrics.** (A) Age, (B) Weight, (C) Gender, (D) pre-ECPR lactate, (E) pre-ECPR pH, (F) Duration of ECMO, and (G) Duration of CPR, and (H) Single Ventricle Physiology. Egger's tests were additionally conducted and are displayed in the top left of each funnel plot. No publication bias was detected in any metric except duration of CPR.
