# Supplementary material for: Predictors of survival for pediatric extracorporeal cardiopulmonary resuscitation: A systematic review and meta-analysis
Source: PubMed Central journal article supplement — Medicine (Baltimore). 2022 Sep 30;101(39):e30860. doi: 10.1097/MD.0000000000030860 (PMC9524896; doi:10.1097/md.0000000000030860), 2022-09-30
Supplement: medi-101-e30860-s009.pdf [file medi-101-e30860-s009.pdf]

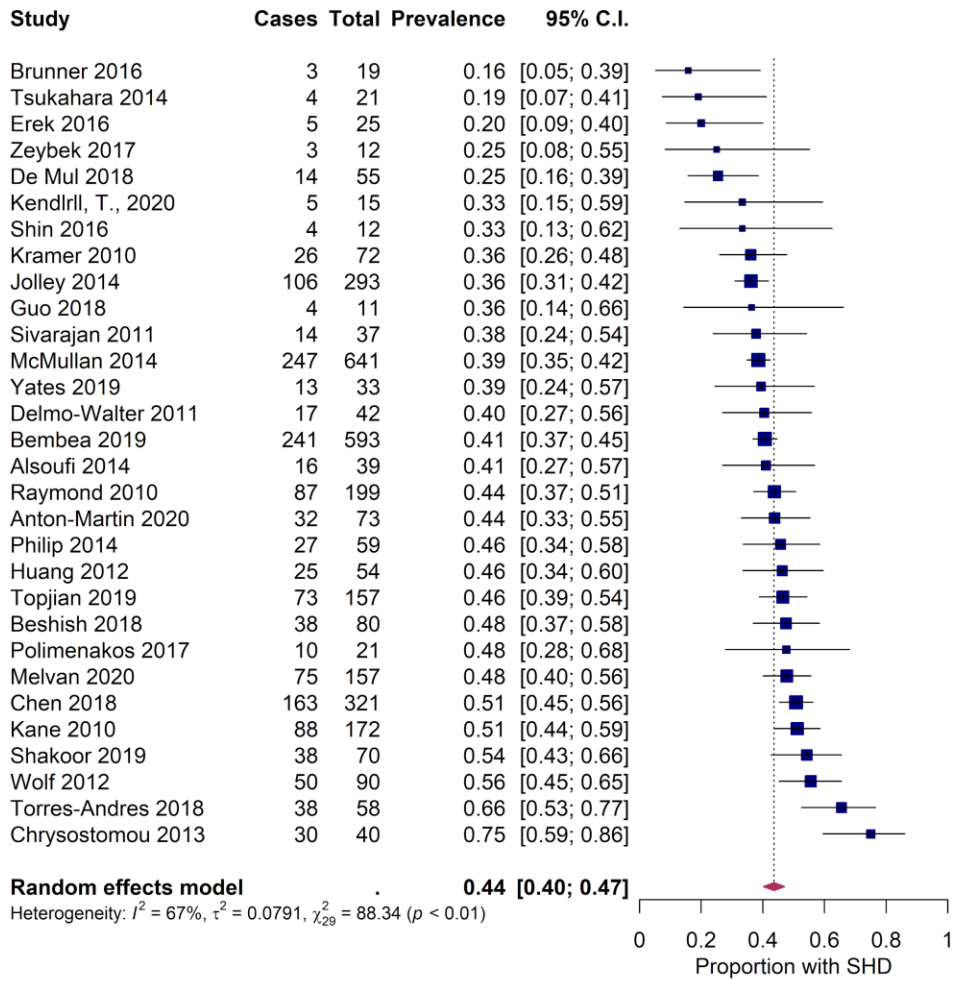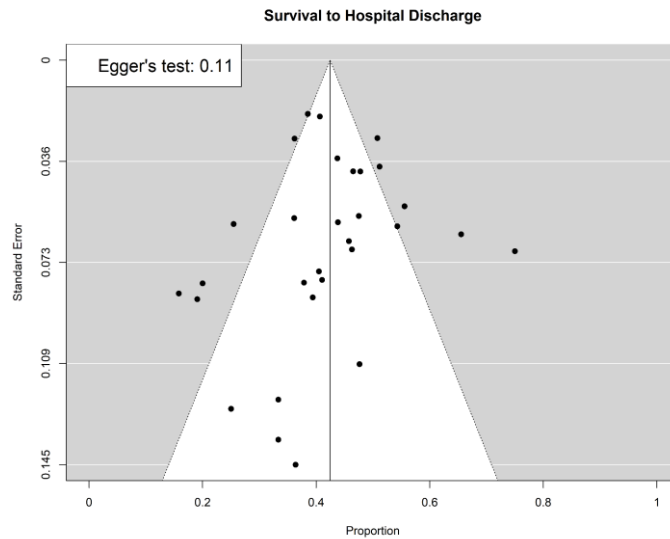

**Supplemental Figure 3. Overall survival (A) Results of pooled survival analysis (B) Funnel plot with Egger's test**
