# Supplementary material for: Predictors of survival for pediatric extracorporeal cardiopulmonary resuscitation: A systematic review and meta-analysis
Source: PubMed Central journal article supplement — Medicine (Baltimore). 2022 Sep 30;101(39):e30860. doi: 10.1097/MD.0000000000030860 (PMC9524896; doi:10.1097/md.0000000000030860), 2022-09-30
Supplement: medi-101-e30860-s010.pdf [file medi-101-e30860-s010.pdf]

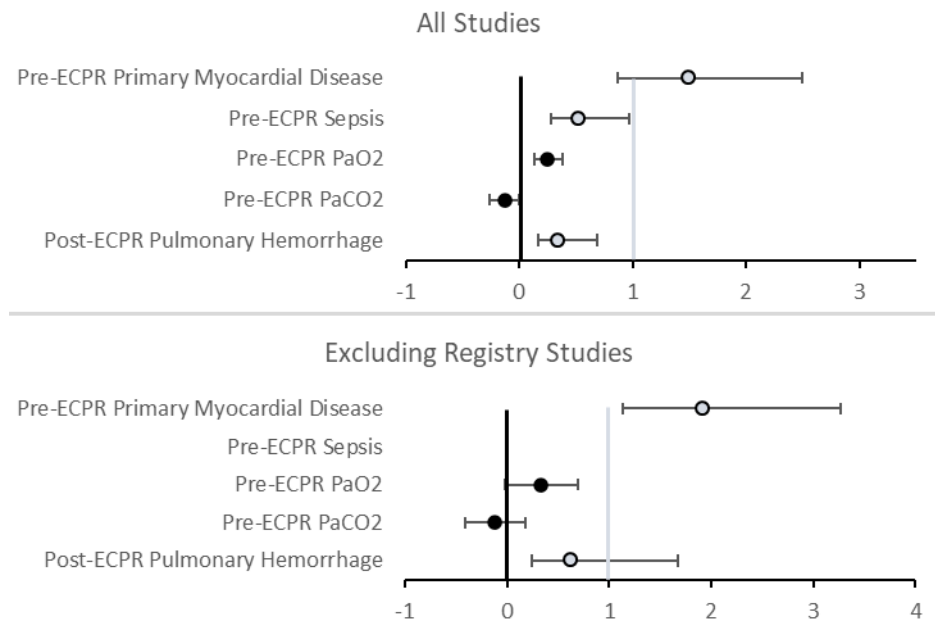

**Supplemental Figure 4. Sensitivity Analysis Excluding any Registry Database Study** A forest plot is depicted showing the combined effect sizes for each metric when all studies are included (top) and when all registry database studies are excluded (bottom). Metrics with gray circles depict the Risk Ratio difference and metrics with black circles depict the Standardized Mean Difference, consistent with how they are shown in all other forest plots in this paper. 25 of the 30 included metrics were significant both with and without any registry database study. Pulmonary hemorrhage, PaCO<sub>2</sub>, PaO<sub>2</sub>, and pre-ECPR sepsis all were not significant without the inclusion of registry studies. Of note, without registry studies, these four metrics lost 62-94% of their included patient population and had four or fewer studies remaining. As such, the loss of significance for these metrics is likely due to a lack of power. Interestingly, Primary Myocardial Disease became a significant predictor of survival, but also lost 60% of its included patient population.
