# Supplementary figures and images for: Predictors of survival for pediatric extracorporeal cardiopulmonary resuscitation: A systematic review and meta-analysis
Source: PubMed Central journal article supplement — Medicine (Baltimore). 2022 Sep 30;101(39):e30860. doi: 10.1097/MD.0000000000030860 (PMC9524896; doi:10.1097/md.0000000000030860), 2022-09-30

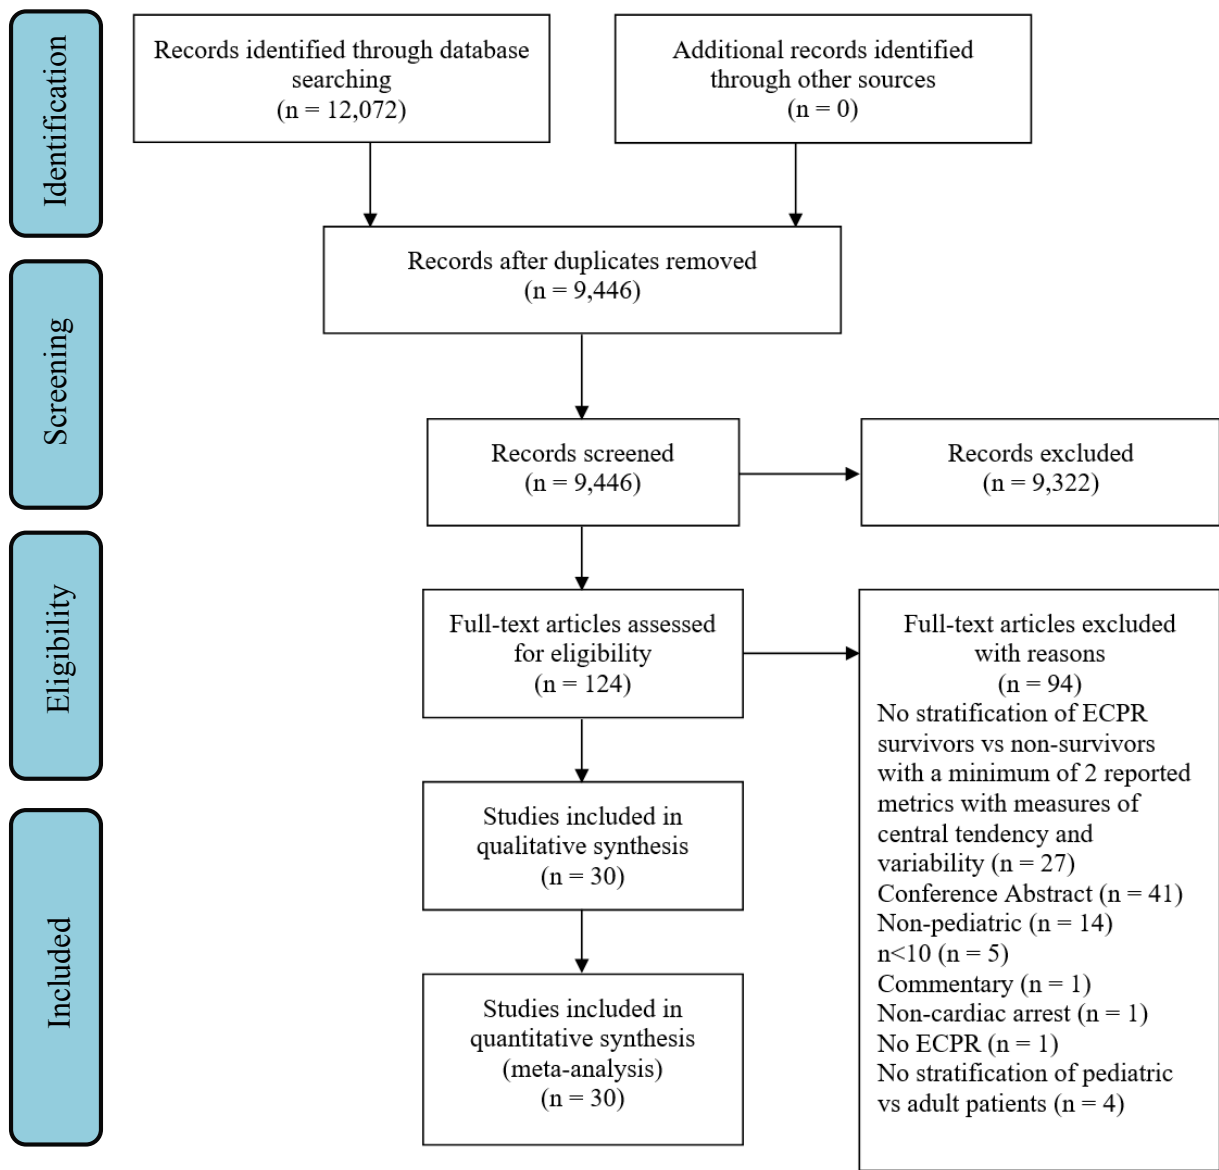

**Supplemental Figure 1. PRISMA Flow diagram of included and excluded articles**

Supplement: medi-101-e30860-s007.pdf [file medi-101-e30860-s007.pdf]
